# Supplementary material
Source: Springer Nature journal article supplement (https://www.springermedizin.de/resource/supplementary/13256_2014_3051_MOESM3_ESM.docx/9651194)

Graph 2

**
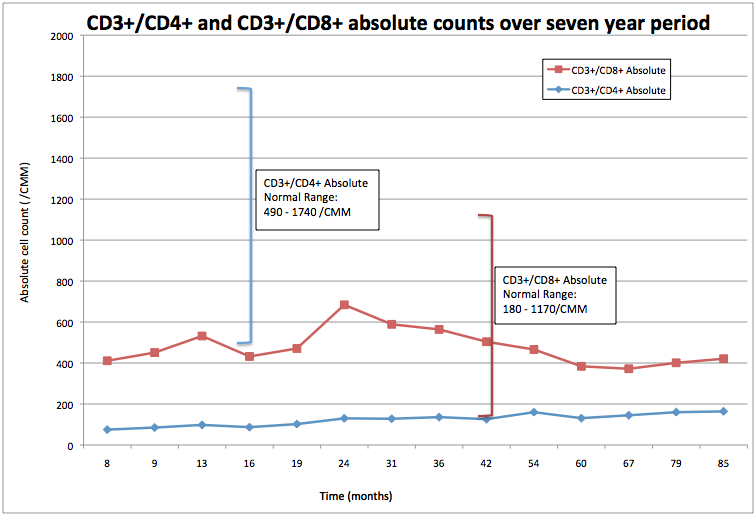
**

Supplement: MOESM3 [file 9651194]
